# Supplementary material for: Usability and optimization of online apps in user’s context
Source: PeerJ journal article supplement (doi:10.7717/peerj-cs.2561), 2024-12-24
Supplement: Raw_data.zip [file Raw_data.zip]

## Sheet: Sheet1
Website Usability Data Analysis for Guidance 81						Representation of Guidance 81 in Guidance Table
Guideline Identifier	Rule Type Properties	Results Fields				pk	Guideline	Reason	Rule Type	Rule Cat	rule	rule
Guideline 81	Rule Type 1 Properties	Tags:3 <br>									Severity	Group
						81	URLs should not be complex	URLs should ideally be less than 50 characters. Such URLs are beneficial for both usability and SEO	1	1	5	5
Data Visualization - Usability Violations
Implementation Level	Usability Violation	Priority Rating
Green	Violation 1	4
Green	Violation 2	3
Green	Violation 3	2
Green	Violation 4	2
Amber	Violation 5	5
Amber	Violation 6	4
Amber	Violation 7	3
Red	Violation 8	5
Red	Violation 9	5
No. of Guidance against Each Category
Usability Category	Number of Guidelines
Optimizing the user experience	29
Hardware and software	4
The homepage	12
Page layout	9
Navigation	27
Scrolling and paging	3
Headlines, titles, and labels	18
Links	21
Text appearance	18
Lists	13
Screen-based controls (widgets)	27
Graphics, images, and multimedia	17
Writing web content	18
Content organization	8
Search	16
Total Guidelines	240
Interpretation of Guidance in Terms of their Implementation Category
Categories for Level of Implementation	Interpretation
Green	· The framework of OptiFlow allows for the comprehensive implementation of guidelines within a database.
	· The framework possesses the capability to ascertain whether the presently loaded page satisfies this criterion autonomously.
	· Due to the ability to precisely quantify these principles within clearly defined contexts, the system adhering to this guideline consistently produces outcomes that may be anticipated.
Categorization and Implementation Levels in OptiFlow Framework
Implementation Level	Description	Characteristics
Green	Easily Implementable	Well-defined parameters and measurable outcomes.
		Guidelines that can be integrated without complex AI algorithms.
		Quantifiable and demonstrable results.
Amber	Moderately Complex	Guidelines with nuances requiring AI algorithm integration.
		May involve patterns and trends recognition.
		Improved integration with additional AI technology.
Red	Highly Complex	Abstract and complex guidelines.
		It may require advanced AI algorithms or specialized user interventions.
		Often entails non-standard usability challenges.
